# Supplementary material for: ACE-inhibition induces a cardioprotective transcriptional response in the metabolic syndrome heart
Source: PubMed Central journal article supplement (PMC6212468; doi:10.1038/s41598-018-34547-9), 2018-11-01
Supplement: 41598_2018_34547_MOESM1_ESM.pdf [file 41598_2018_34547_MOESM1_ESM.pdf]

1 **Supplementary materials**

2  
3 **ACE-inhibition induces a cardioprotective transcriptional response in the metabolic**  
4 **syndrome heart.**

5  
6 **Aziza Yakubova<sup>1§</sup>, Lieven Thorrez<sup>2§</sup>, Dmitry Svetlichnyy<sup>3</sup>, Liesbeth Zwarts<sup>4</sup>, Veerle**  
7 **Vulsteke<sup>4</sup>, Griet Laenen<sup>5</sup>, Wouter Oosterlinck<sup>1</sup>, Yves Moreau<sup>5</sup>, Luc Dehaspe<sup>6</sup>, Jeroen**  
8 **Van Houdt<sup>6</sup>, Álvaro Cortés-Calabuig<sup>6</sup>, Bart De Moor<sup>5</sup>, Patrick Callaerts<sup>4\*</sup>, Paul**  
9 **Herijgers<sup>1\*</sup>**

10  
11  
12 <sup>1</sup>Department of Cardiovascular Sciences, Research Unit of Cardiac Surgery, KU Leuven, Leuven, Belgium

13 <sup>2</sup>Department of Development and Regeneration, Interdisciplinary Research Facility, KU Leuven, Campus Kulak  
14 Kortrijk, Kortrijk, Belgium

15 <sup>3</sup>Department of Human Genetics, Laboratory of Computational Biology, KU Leuven, Leuven, Belgium

16 <sup>4</sup>Department of Human Genetics, Laboratory of Behavioral and Developmental Genetics, KU Leuven, Leuven,  
17 Belgium

18 <sup>5</sup>Department of Electrical Engineering, ESAT - STADIUS, Stadius Centre for Dynamical Systems, Signal  
19 Processing and Data Analytics, KU Leuven, Leuven, Belgium

20 <sup>6</sup>Department of Human Genetics, Genomics Core, Center for Human Genetics, University Hospital, KU Leuven,  
21 Leuven, Belgium

22  
23 §joint first authors

24 \*joint corresponding authors

25  
26 Correspondence to:

27  
28 Paul Herijgers

29 email: paul.herijgers@kuleuven.be

30  
31 Patrick Callaerts

32 email: patrick.callaerts@kuleuven.be

33

34

35

Supplementary Figure S1 Cardiac hypertrophy signaling

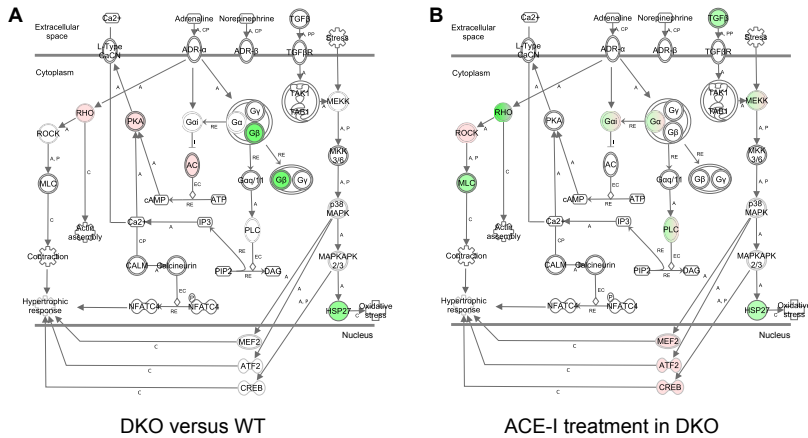

36

37 **Supplementary Figure S1.** Cardiac hypertrophy signaling. (A) Differential gene expression  
 38 in DKO mice versus WT mice. (B) Differential gene expression in DKO mice after ACE-I.  
 39 Red=upregulated, green=downregulated. C=causes, E=Expression, EC=Enzyme Catalysis,  
 40 I=inhibition, L=Molecular cleavage or degradation, O=Oxidized, PP=Protein-Protein binding,  
 41 RE=Reaction, TR=Translocation.

42

43

Supplementary Figure S2 LXR-RXR signaling

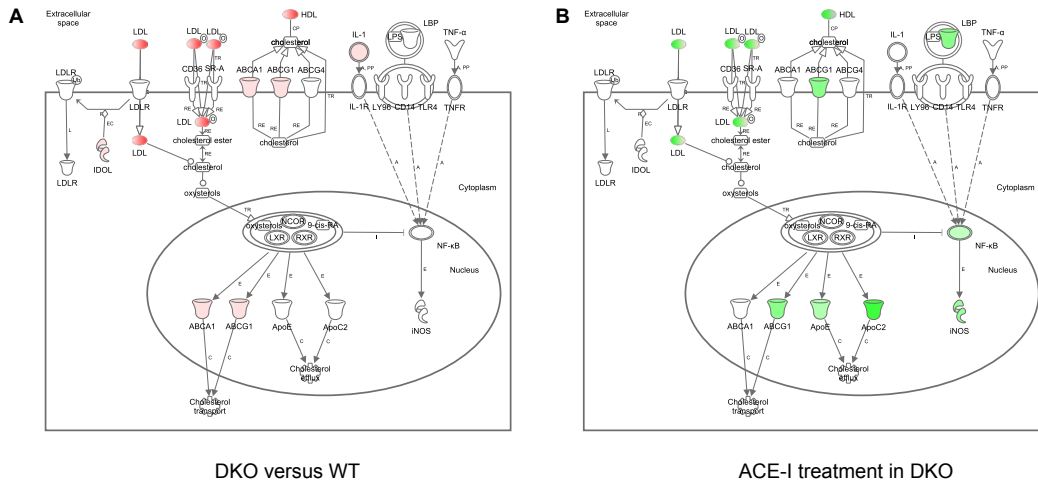

45

46 **Supplementary Figure S2. LXR-RXR signaling.** (A) Differential gene expression in DKO  
 47 mice versus WT mice. (B) Differential gene expression in DKO mice after ACE-I. The  
 48 retinoid X receptors (RXRs) are nuclear receptors that mediate the biological effects of  
 49 retinoids by their involvement in retinoic acid-mediated gene activation. RXR $\alpha$  is the  
 50 dimerization partner for the type II nuclear receptors that includes the liver X receptor (LXR).  
 51 The LXR receptor is activated by oxysterol ligands and forms a heterodimer with RXR. After  
 52 heterodimerization LXR initiates transcription of target genes by binding to the LXR response  
 53 element. LXR/RXR is involved in the regulation of lipid metabolism, inflammation, and  
 54 cholesterol to bile acid catabolism. Genes regulated by LXR include ABCA1, ABCG1, ApoE  
 55 and ApoC2 responsible for cholesterol transport and efflux. LXR/RXR also influences iNOS  
 56 through NF- $\kappa$ B inhibition. Red=upregulated, green=downregulated. C=causes, E=Expression,  
 57 EC=Enzyme Catalysis, I=inhibition, L=Molecular cleavage or degradation, O=Oxidized,  
 58 PP=Protein-Protein binding, RE=Reaction, TR=Translocation.

59

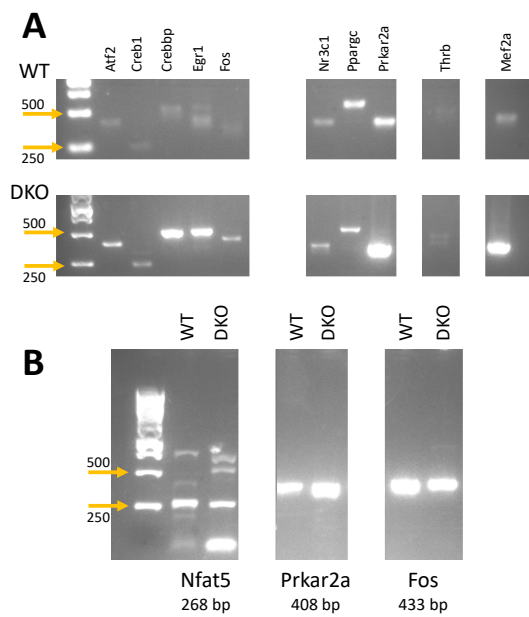

60

61 **Supplementary Figure S3. RT-PCR results for transcription factor expression in WT**  
 62 **and DKO. (A)** The observed sizes correspond to the expected size for the various fragments  
 63 (see Supplementary Table S6). The WT and DKO PCR products were run on two separate  
 64 gels and the parts of the gels with the relevant band sizes were cropped. The white vertical  
 65 fields mask lanes on the same gel where no PCR product was detected, this to make the  
 66 presentation clearer. The original intensity of the gels is displayed. **(B)** Nfat5, Prkar2a and Fos  
 67 were rerun starting with new cDNA batches to confirm expression. The PCR products for  
 68 each gene were run on separate gels. The original intensity of the gels is displayed. The  
 69 arrows mark the 250 bp and 500 bp markers, respectively. Unannotated gels are shown on the  
 70 following page.

71

72

73

74

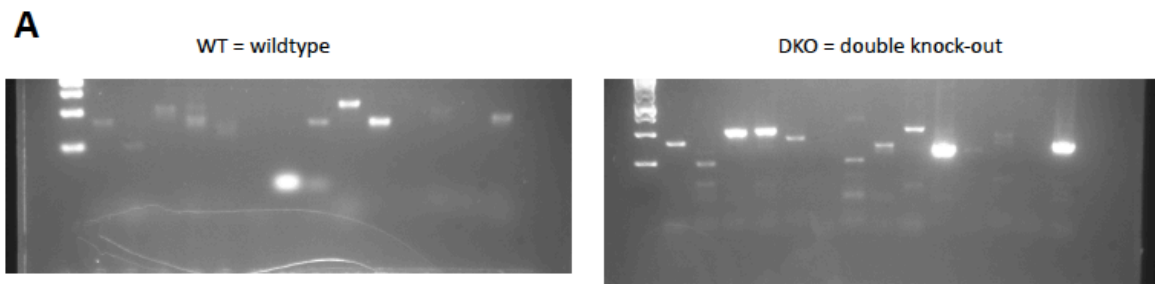

75

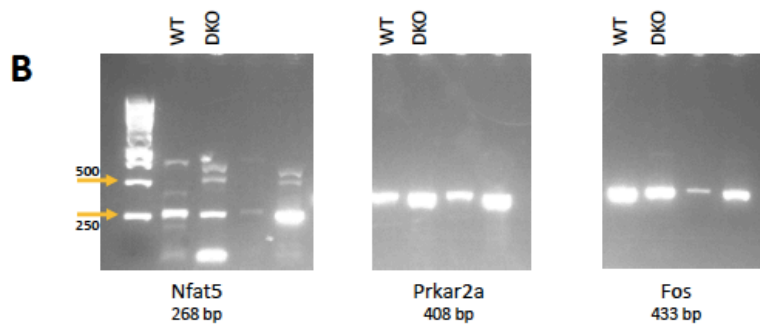

76

77 **Supplementary Figure S3bis. Unannotated gels corresponding to Suppl. Figure S3.**

78



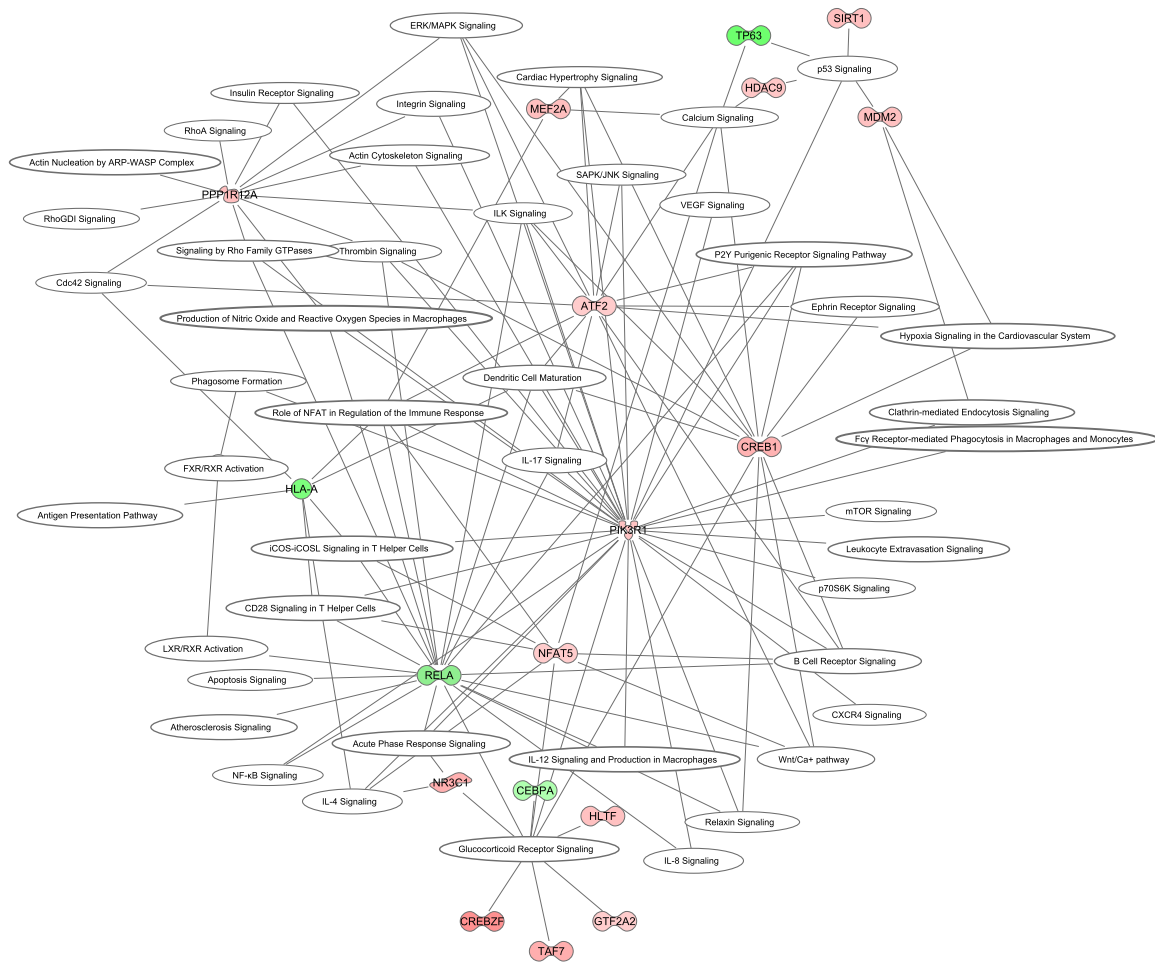

87

88 **Supplementary Figure S5.** Pathways significantly affected by Ace-I treatment in DKO.  
 89 Differential genes are plotted in a network representation to show involvement in pathways.  
 90 Red and green color indicate up- and downregulation, respectively.

91

92

93

94

95 **Supplementary Tables**

96

97 **Supplementary Table S1.** 72 significantly enriched pathways identified by Ingenuity  
 98 Pathway Analysis (IPA).

99

100

101 **Supplementary Table S2.** Summary table of qRT-PCR analyses of WT versus DKO.

102 Expression levels of genes were normalized to beta-actin and the mean  $\Delta$ Ct values were  
 103 compared using T-tests. Statistically significant changes are highlighted in bold. In addition,  
 104 we assigned trends using the following rationale: trend: ▼ if WT/DKO  $\geq$  1.5 ▲ if  
 105 WT/DKO  $\leq$  0.5. The fact that a number of values that show clear trends are not statistically  
 106 significant is probably to the number of biological replicates that were used, i.e. 3. Color  
 107 coding is the same as in the pathway figures (red= up, green=down).

108

| Gene    | WT             | DKO            | p-value           | Trend for DKO |
|---------|----------------|----------------|-------------------|---------------|
| ApoA-1  | 0.062 ± 0.006  | 0.0942 ± 0.011 | 0.234             | ▲             |
| Abcg1   | 0.948 ± 0.0132 | 4.057 ± 0.097  | <b>&lt;0.0001</b> | ▲             |
| PKA     | 6.620 ± 0.211  | 11.813 ± 1.491 | 0.117             | =             |
| Fgg     | 0.026 ± 0.003  | 1.545 ± 0.781  | 0.324             | ▲             |
| Fos     | 7.931 ± 0.669  | 3.641 ± 0.388  | <b>0.036</b>      | ▼             |
| Hsp27   | 0.855 ± 0.038  | 1.723 ± 0.259  | 0.129             | =             |
| Hdl     | 0.246 ± 0.052  | 0.595 ± 0.090  | 0.126             | =             |
| IL-1    | 0.273 ± 0.055  | 2.398 ± 0.330  | <b>0.0215</b>     | ▲             |
| RhoA    | 9.901 ± 0.967  | 23.42 ± 1.970  | <b>0.0236</b>     | ▲             |
| Serpin  | 6.045 ± 0.191  | 26.321 ± 3.562 | <b>0.030</b>      | ▲             |
| ApoB    | 0.0374 ± 0.004 | 0.717 ± 0.366  | 0.344             | ▲             |
| Pla2g1b | 0.435 ± 0.006  | 0.852 ± 0.195  | 0.286             | =             |
| Pla2g7  | 1.069 ± 0.135  | 3.814 ± 0.195  | <b>0.0025</b>     | ▲             |

109

110

111



112 **Supplementary Table S3.** Summary table of qRT-PCR analyses of WT versus WT treated  
 113 with ACE-I (WT-AI). Expression levels of genes were normalized to beta-actin and the mean  
 114  $\Delta$ Ct values were compared using T-tests. Statistically significant changes are highlighted in  
 115 bold. In addition, we assigned trends using the following rationale: trend: ▼ if WT/DKO  $\geq$   
 116 1.5 ▲ if WT/DKO  $\leq$  0.5. The fact that a number of values that show clear trends are not  
 117 statistically significant is probably to the number of biological replicates that were used, i.e. 3.  
 118 Color coding is the same as in the pathway figures (red= up, green=down).

119  
 120

| Gene   | WT             | WT-ACE         | P-value | Trend for ACE |
|--------|----------------|----------------|---------|---------------|
| Dkk3   | 1.425 ± 0.380  | 0.164 ± 0.016  | 0.128   | ▼             |
| Fos    | 9.921 ± 0.873  | 5.156 ± 1.237  | 0.143   | ▼             |
| Lgfbp6 | 3.403 ± 0.321  | 3.138 ± 0.194  | 0.704   | =             |
| Myl1   | 95.157 ± 15.90 | 54.74 ± 6.91   | 0.249   | ▼             |
| Myl4   | 0.196 ± 0.026  | 0.116 ± 0.025  | 0.270   | ▼             |
| Myl7   | 343.4 ± 40.8   | 116.1 ± 40.7   | 0.085   | ▼             |
| Nr4a1  | 24.169 ± 7.541 | 14.358 ± 2.355 | 0.513   | ▼             |
|        |                |                |         |               |

121

122 **Supplementary Table S4.** Summary table of qRT-PCR analyses of DKO versus DKO treated  
 123 with ACE-I (DKO-AI). Expression levels of genes were normalized to beta-actin and the  
 124 mean  $\Delta$ Ct values were compared using T-tests. Statistically significant changes are  
 125 highlighted in bold. In addition, we assigned trends using the following rationale: trend: ▼ if  
 126 WT/DKO  $\geq$  1.5 ▲ if WT/DKO  $\leq$  0.5. The fact that a number of values that show clear  
 127 trends are not statistically significant is probably to the number of biological replicates that  
 128 were used, i.e. 3. Color coding is the same as in the pathway figures (red= up, green=down).  
 129

| Gene    | DKO           | DKO-ACE       | p-value      | Trend for ACE |
|---------|---------------|---------------|--------------|---------------|
| ApoA-1  | 0.074 ± 0.009 | 0.249 ± 0.065 | 0.200        | ▲             |
| Abcg1   | 2.634 ± 0.063 | 3.028 ± 0.411 | 0.615        | =             |
| PKA     | 7.670 ± 0.968 | 14.87 ± 1.900 | 0.123        | =             |
| Dkk3    | 2.375 ± 0.734 | 0.319 ± 0.100 | 0.184        | ▼             |
| Fgg     | 1.003 ± 0.507 | 0.046 ± 0.008 | 0.337        | ▼             |
| Fos     | 2.365 ± 0.252 | 2.186 ± 0.411 | 0.841        | =             |
| Hsp27   | 1.119 ± 0.168 | 1.740 ± 0.275 | 0.329        | =             |
| Hdl     | 0.423 ± 0.064 | 0.955 ± 0.162 | 0.154        | =             |
| Igfbp6  | 3.519 ± 0.085 | 6.310 ± 1.878 | 0.439        | =             |
| Il-1    | 1.737 ± 0.239 | 0.056 ± 0.013 | <b>0.015</b> | ▼             |
| Myl1    | 140.7 ± 34.04 | 116.4 ± 23.86 | 0.752        | =             |
| Myl4    | 0.313 ± 0.071 | 0.503 ± 0.123 | 0.483        | =             |
| Myl7    | 391.2 ± 100.1 | 585.6 ± 153.9 | 0.574        | =             |
| Myl9    | 30.46 ± 5.023 | 28.68 ± 5.188 | 0.893        | =             |
| RhoA    | 16.71 ± 1.405 | 21.92 ± 4.208 | 0.534        | =             |
| Rictor  | 2.276 ± 0.467 | 5.293 ± 0.820 | 0.139        | ▲             |
| Serpin  | 18.78 ± 2.541 | 18.09 ± 2.579 | 0.918        | =             |
| ApoB    | 0.512 ± 0.261 | 0.102 ± 0.020 | 0.418        | ▼             |
| Pla2g1b | 0.608 ± 0.139 | 0.360 ± 0.019 | 0.368        | ▼             |
| Pla2g7  | 2.721 ± 0.139 | 2.353 ± 0.532 | 0.719        | =             |

130

131

132 **Supplementary Table S5. Summary table of qRT-PCR primers**

133

| Gene    | Forward primer         | Reverse primer         |
|---------|------------------------|------------------------|
| ApoA-1  | TGTGGATGCGGTCAAAGACA   | TCCAGGAGATTCAGGTTACAGC |
| Abcg1   | AAGGTCTCCAATCTCGTGCC   | TCCATGACAAAGTCTGCTGGG  |
| Pka     | CGAGCAGGAGAGCGTGAA     | CCTTGTGCTTCACCAGCATC   |
| Dkk3    | GGCAAGAGGAGCCATGAATGT  | CCACCTTTGGTGGCCTTTTG   |
| Fgg     | GACGGCATTATTTGGGCGAC   | AACGTCTCCAGCCTGTTTGG   |
| Fos     | TTCAACGCCGACTACGAGG    | TCTGCGCAAAGTCTGTGT     |
| Hsp27   | GGCAGTACTTGGGATCAGGG   | CAGGGGTCCACATCTTCTCC   |
| Hdl     | CCTTCTGTGTGGTCTGTA     | TCAGCCTGCCAGCTTTTACTTC |
| Igfbp6  | CCGTCCGAGGAGACTACAAAG  | GTGGATTCTTCTGCCGGTCT   |
| IL-1    | GCTTGAGTCGGCAAAGAAATCA | AGATGGTCAATGGCAGAAGTGT |
| Myl1    | CGGAGTTTTCAAGCACGCAA   | TCTGCATGGTGGTAAGCTGG   |
| Myl4    | TATCAACGGCTCAAGTCGGC   | GGTGGGACCTCACTCATCTCA  |
| Myl7    | GGCACAACGTGGCTCTTCTA   | ACACTTACCCTCCCGAGCTG   |
| Myl9    | CTCTGCAGCAGGGAAACC     | CATGGCGAAGACATTGGACG   |
| Nr4a    | ATGGAGCTGGAACAAACGCC   | TTGAATACAGGGCATCTCTGGG |
| RhoA    | GGTCCTCCGTCGGTCTCTC    | GATGCAAGGCTCAAGGCGAG   |
| Rictor  | AATGCACCCGTCCTTGTCTC   | TCATAAACCTGCTTGGCGTC   |
| Serpin  | ACAACCCGACAGAGACAATCC  | TTCGTCCCAAATGAAGGCGT   |
| ApoB    | TACTTCCACCCACAGTCCCCT  | CCTTAGAAGCCTTGGGCACAT  |
| Pla2g1b | GGACGACTTAGACAGGTGCT   | GTGTTGGTGTAGGGGTTGTCT  |
| Pla2g7  | GAGGCTGTATGCTCAACCCA   | GGCTTCAGTTTGATGTTCTGGT |

134

135

136 **Supplementary Table S6. Summary table of RT-PCR primers**

| Gene    | Forward primer         | Reverse primer        | Expected size |
|---------|------------------------|-----------------------|---------------|
| Atf2    | GTGGCCAGCGTTTTACCAAC   | GCTGGACGAACGATAGCTGA  | 406           |
| Creb1   | GAGGTGTAGTTTGACGCGGT   | TGAGCTGCTGGCATGGATAC  | 243           |
| Crebbp  | GCCATTGTGCATCTTCACG    | GCTGCTGTAGGTATCGTGCT  | 524           |
| Egr1    | TTACCCGCCATATCCGCATC   | CTGGGAGAAAAGGTCGCTGT  | 526           |
| Fos     | TGCCAACTTTATCCCCACGG   | TCGGTGGGCTGCCAAAATAA  | 433           |
| Foxo3   | GAGCTGGAGCTCGAACCTT    | GGAGCATTTCCTTGGTTGCC  | 561           |
| Nfat5   | CCTCTGAAGCAGGGAGTGTC   | CTTCGGGGTTGATGGATGCT  | 268           |
| Nr3c1   | GTGGAAGGACAGCACAATTACC | ATCCTGGTATCGCCTTTGCC  | 403           |
| Ppargc1 | ACTCTCAGTAAGGGGCTGGT   | TAGCTGAGCTGAGTGTTGGC  | 563           |
| Prkar2a | CTCCAGCACTGTAACAGCCA   | GCCCAATGCACCTTTACCT   | 408           |
| Thrb    | CGCTCTGATCCGTGTTTTCC   | CGATAGTGGTACCCTGTGGC  | 490           |
| Rela    | GCTGCGGAGCTTGTAGTCG    | TGCTTCGGCTGTTTCGATGAT | 392           |

137
